# Supplementary material
Source: publisher figshare collection journal article supplement (https://sage.figshare.com/ndownloader/files/17447807)
Supplement: Supplementary file 1 [file 17447807]

## Appendix A: Survey Questions and Summary Statistics

| Table 5: Demographic Variable Summary Statistics |           |           |      |      |
|--------------------------------------------------|-----------|-----------|------|------|
|                                                  | Mean      | Std. Dev. | Min. | Max. |
| Age                                              | 37.12667  | 12.23815  | 18   | 84   |
| Education Level                                  | 2.226164  | 1.305485  | 0    | 5    |
| Female                                           | 0.4345898 | 0.4962535 | 0    | 1    |
| Caucasian                                        | 0.7871397 | 0.4097843 | 0    | 1    |
| Political Ideology                               | 3.37694   | 1.753676  | 1    | 7    |
| Military Veteran                                 | 0.0776053 | 0.2678466 | 0    | 1    |
| Religious                                        | 0.3481153 | 0.4769018 | 0    | 1    |

The following survey questions were asked of the subjects:

7. What is your age? \_\_\_\_\_

8. What is your highest level of educational attainment?

Some High School \_\_\_\_\_

High School or GED \_\_\_\_\_

Some College \_\_\_\_\_

Associates Degree \_\_\_\_\_

Bachelors Degree \_\_\_\_\_

Masters Degree \_\_\_\_\_

Doctoral Degree \_\_\_\_\_

9. What is your sex? (Male or Female)

Male \_\_\_\_\_

Female \_\_\_\_\_

10. What is your race?

White \_\_\_\_\_

Black \_\_\_\_\_

Latino \_\_\_\_\_

Asian \_\_\_\_\_

American Indian \_\_\_\_\_

Multi-Racial \_\_\_\_\_

Other \_\_\_\_\_

11. Political Ideology on a 1-7 scale

Liberal 1 2 3 4 5 6 7 Conservative

12. Are you a military veteran?

Yes \_\_\_\_\_

No \_\_\_\_\_

13. Would you describe yourself as Religious?

Yes \_\_\_\_\_

No \_\_\_\_\_

14. What best describes your Religious Attendance?

Weekly \_\_\_\_\_

Monthly \_\_\_\_\_

Annually \_\_\_\_\_

Never \_\_\_\_\_

## Appendix B: Robustness Checks Regression Models

**Table 6: OLS Robustness Check Models that Include Sociodemographic Covariates**

| Dependent Variables: | Model 9        |         | Model 10    |         | Model 11 |         | Model 12  |         |
|----------------------|----------------|---------|-------------|---------|----------|---------|-----------|---------|
|                      | Responsibility |         | Performance |         | Blame    |         | Blame     |         |
|                      | Coef.          | T-Stat. | Coef.       | T-Stat. | Coef.    | T-Stat. | Coef.     | T-Stat. |
| Organizational Chart | 0.812***       | (2.90)  | 0.476*      | (1.93)  | 0.768*** | (2.73)  | -         | -       |
| Military Contractors | 0.304          | (1.16)  | -1.742***   | (-7.52) | 0.346    | (1.31)  | -         | -       |
| Responsibility       | -              | -       | -           | -       | -        | -       | 0.769***  | (25.18) |
| Performance          | -              | -       | -           | -       | -        | -       | -0.0832** | (-2.53) |
| Veteran Status       | -0.0641        | (-0.13) | 1.780***    | (4.04)  | -0.694   | (-1.38) | -0.506    | (-1.54) |
| Education Level      | 0.173*         | (1.69)  | -0.168*     | (-1.86) | 0.0744   | (0.72)  | -0.0726   | (-1.09) |
| Age                  | 0.0319***      | (2.85)  | -0.00652    | (-0.66) | 0.0232** | (2.07)  | -0.00223  | (-0.31) |
| Female               | 0.0881         | (0.33)  | 0.416*      | (1.75)  | 0.0118   | (0.04)  | -0.0203   | (-0.12) |
| Political Ideology   | 0.131          | (1.60)  | 0.148**     | (2.04)  | 0.192**  | (2.32)  | 0.103*    | (1.94)  |
| Religious            | 0.408          | (1.40)  | 0.0793      | (0.31)  | 0.426    | (1.46)  | 0.121     | (0.64)  |
| Caucasian            | -0.440         | (-1.33) | 0.157       | (0.54)  | -0.214   | (-0.65) | 0.137     | (0.64)  |
| Constant             | 3.395***       | (5.77)  | 4.936***    | (9.52)  | 2.916*** | (4.94)  | 0.836**   | (2.08)  |
| R-Squared            | 0.06           |         | 0.18        |         | 0.06     |         | 0.61      |         |
| Observations         | 450            |         | 450         |         | 450      |         | 450       |         |

Notes: Two-Sided T-Tests; \*=p<0.1; \*\*=p<0.05; \*\*\* p<0.01; and one observation dropped from non-response to a question.

## Appendix C: Experimental Manipulation Robustness Checks

| <b>Table 7: Post Estimation F-Test Results</b>       |                |                       |                    |
|------------------------------------------------------|----------------|-----------------------|--------------------|
| <b>Null Hypothesis: Short Chart - Long Chart = 0</b> |                |                       |                    |
|                                                      | <b>Model 1</b> | <b>Model 2</b>        | <b>Model 3</b>     |
|                                                      | <b>Blame</b>   | <b>Responsibility</b> | <b>Performance</b> |
| <b>F(1, 447)=</b>                                    | 0.00           | 1.16                  | 0.01               |
| <b>Prob.&gt;F=</b>                                   | 0.97           | 0.28                  | 0.94               |

## Appendix D: Direct Effect Tables with Interaction Terms

| Table 8: Direct Effects OLS Regression Models |          |         |          |         |                |         |                |         |             |         |             |         |
|-----------------------------------------------|----------|---------|----------|---------|----------------|---------|----------------|---------|-------------|---------|-------------|---------|
| Dependent Variables:                          | Model 13 |         | Model 14 |         | Model 15       |         | Model 16       |         | Model 17    |         | Model 18    |         |
|                                               | Blame    |         | Blame    |         | Responsibility |         | Responsibility |         | Performance |         | Performance |         |
|                                               | Coef.    | T-Stat. | Coef.    | T-Stat. | Coef.          | T-Stat. | Coef.          | T-Stat. | Coef.       | T-Stat. | Coef.       | T-Stat. |
| <b>Organizational Chart</b>                   | 0.754*** | (2.65)  | 0.898**  | (2.26)  | 0.761***       | (2.68)  | 0.844**        | (2.13)  | 0.432*      | (1.70)  | 0.743**     | (2.10)  |
| <b>Military Contractors</b>                   | 0.463*   | (1.74)  | 0.663    | (1.42)  | 0.384          | (1.44)  | 0.500          | (1.07)  | -1.741***   | (-7.34) | -1.306***   | (-3.13) |
| <b>Interaction Term</b>                       | .        | .       | -0.296   | (-0.52) | .              | .       | -0.170         | (-0.30) | .           | .       | -0.641      | (-1.26) |
| <b>Constant</b>                               | 4.463*** | (16.67) | 4.365*** | (13.32) | 5.219***       | (19.47) | 5.162***       | (15.72) | 5.308***    | (22.20) | 5.095***    | (17.43) |
| <b>R-Squared</b>                              | 0.02     |         | 0.02     |         | 0.02           |         | 0.02           |         | 0.11        |         | 0.12        |         |
| <b>Observations</b>                           | 451      |         | 451      |         | 451            |         | 451            |         | 451         |         | 451         |         |

Notes: Two-Sided T-Tests; \*=p<0.1; \*\*=p<0.05; \*\*\* p<0.01.
